# Supplementary material
Source: MDPI journal article supplement (https://www.mdpi.com/1424-2818/15/7/863)

*Eleutheroschizon duboscqi*

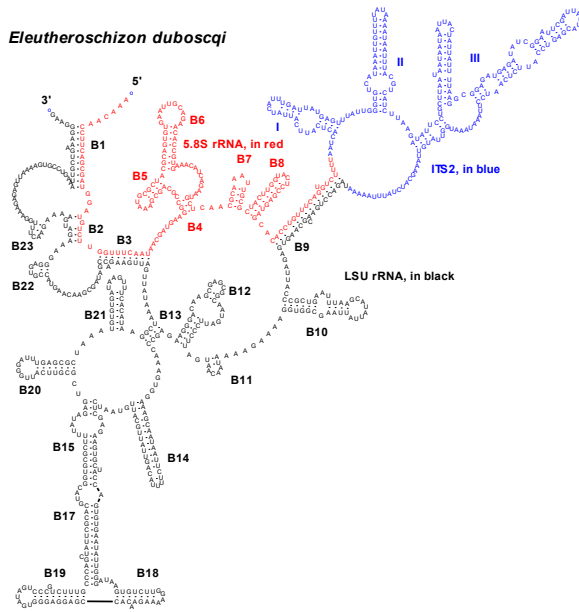

*Eleutheroschizon planoratum*

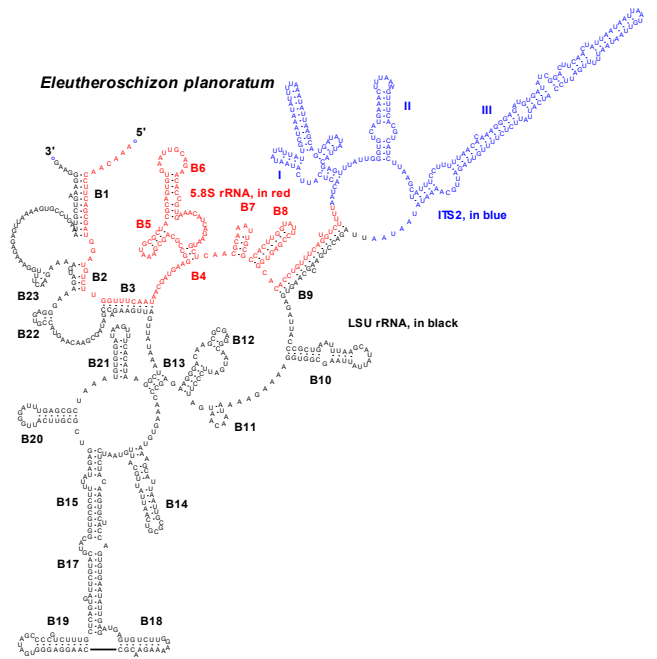

Supplement: s1 [file s1]

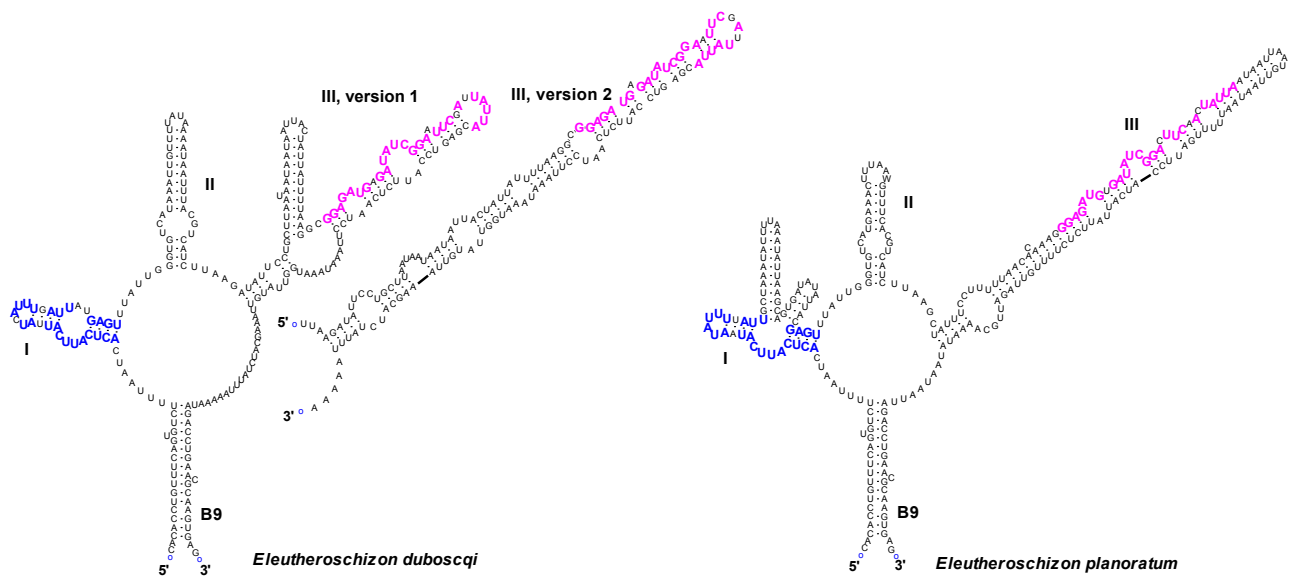

Supplement: s1 [file s1]
